# Supplementary material for: Contrasting seasonal changes in total and intense precipitation in theEuropean Alps from 1903 to 2010
Source: Copernicus journal article supplement (doi:10.5194/hess-2019-690), 2020-01-20
Supplement: Supplementary file 1 [file hess-2019-690-supplement.pdf]

Supplementary material

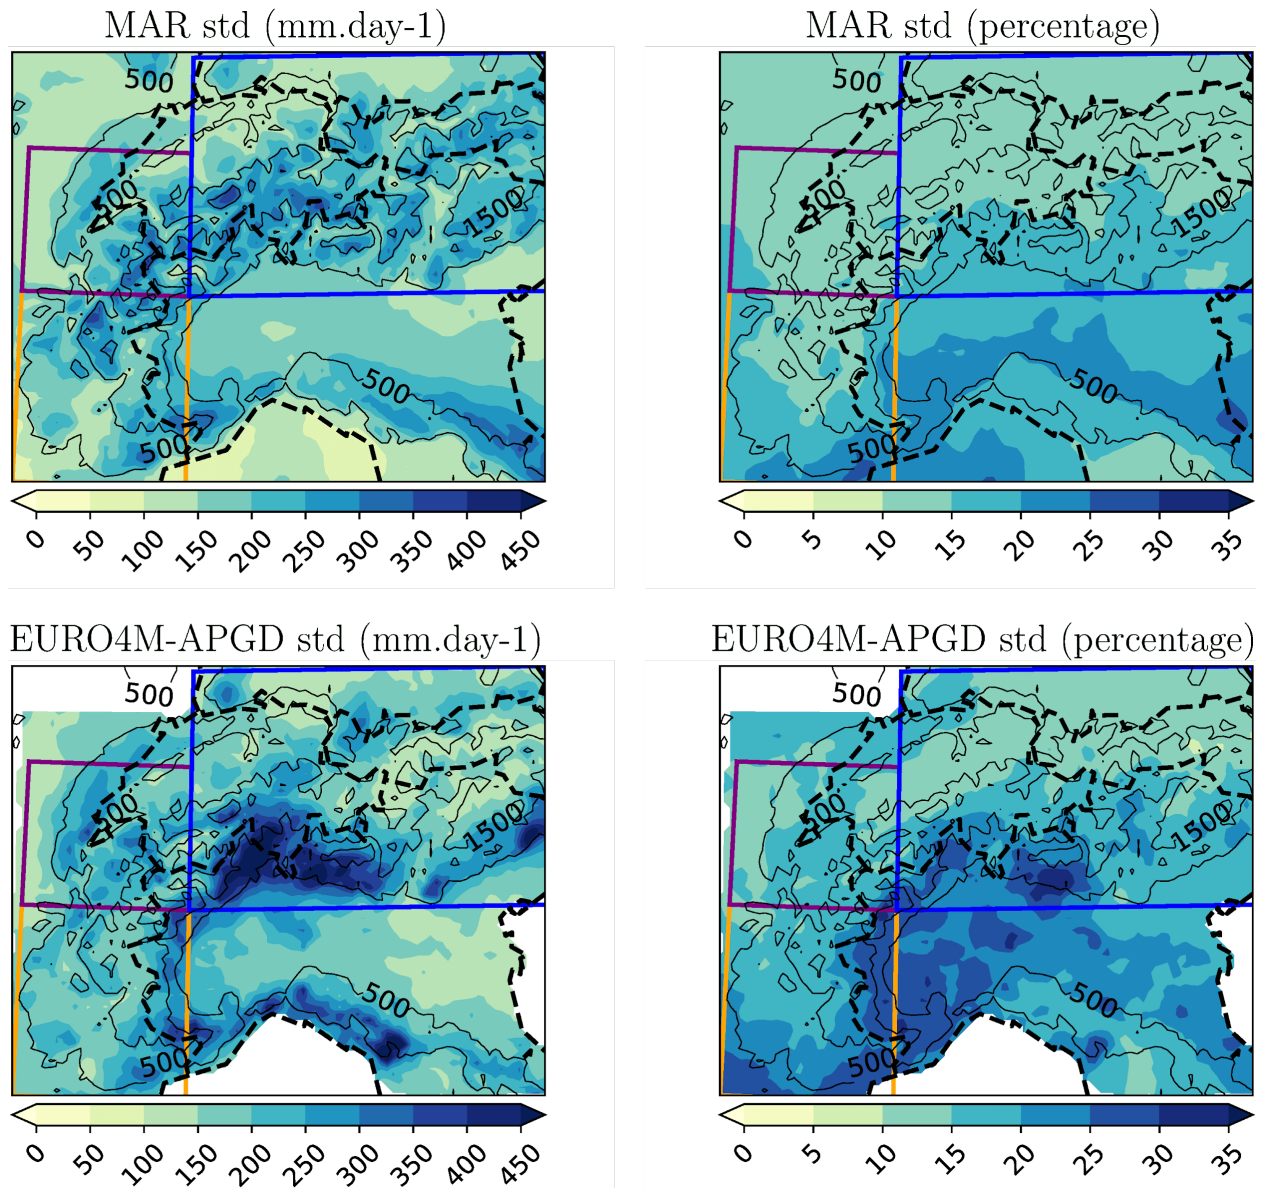

Figure S1: Standard deviation of annual precipitation over 1971-2008, in mm.day-1 (left) and in percent (right), in the MAR experiment (top) and in the EURO4M-APGD dataset (bottom).
